# Supplementary material
Source: publisher site journal article supplement (https://www.dovepress.com/article/507074)
Supplement: Supplementary file 1 [file get_supplementary_file.php]

**Supplementary materials**

**Supplementary Table S1. The edge weight values in the Sleep quality and anxiety network of the Chinese college students.**

|  | S1 | S2 | S3 | S4 | S5 | S6 | S7 | A1 | A2 | A3 | A4 | A5 | A6 | A7 | A8 | A9 | A10 | A11 | A12 | A13 | A14 | A15 | A16 | A17 | A18 | A19 | A20 |
| --- | --- | --- | --- | --- | --- | --- | --- | --- | --- | --- | --- | --- | --- | --- | --- | --- | --- | --- | --- | --- | --- | --- | --- | --- | --- | --- | --- |
| S1 |  | 0.21 | 0.18 | 0.00 | 0.16 | 0.00 | 0.30 | 0.07 | 0.00 | 0.00 | 0.00 | 0.00 | 0.00 | 0.02 | 0.07 | 0.00 | 0.01 | 0.00 | 0.00 | 0.00 | 0.00 | 0.00 | 0.01 | 0.00 | 0.00 | 0.08 | 0.04 |
| S2 | 0.21 |  | 0.08 | 0.02 | 0.15 | 0.03 | 0.04 | 0.02 | 0.00 | 0.01 | 0.00 | 0.00 | 0.00 | 0.05 | 0.01 | 0.00 | 0.00 | 0.01 | 0.00 | 0.00 | 0.00 | 0.00 | 0.01 | -0.01 | 0.00 | 0.12 | 0.03 |
| S3 | 0.18 | 0.08 |  | 0.44 | 0.02 | 0.00 | 0.10 | 0.00 | 0.00 | 0.02 | 0.00 | 0.00 | 0.00 | 0.01 | 0.00 | 0.02 | 0.00 | 0.00 | 0.00 | 0.00 | 0.00 | 0.01 | 0.00 | 0.00 | 0.00 | 0.04 | 0.00 |
| S4 | 0.00 | 0.02 | 0.44 |  | 0.00 | 0.00 | 0.00 | 0.00 | 0.00 | 0.00 | 0.00 | 0.00 | 0.00 | 0.00 | 0.00 | 0.00 | 0.02 | 0.00 | 0.00 | 0.00 | 0.00 | 0.00 | 0.01 | 0.00 | 0.00 | 0.00 | 0.00 |
| S5 | 0.16 | 0.15 | 0.02 | 0.00 |  | 0.00 | 0.24 | 0.03 | 0.00 | 0.00 | 0.00 | 0.00 | 0.00 | 0.04 | 0.00 | 0.00 | 0.03 | 0.01 | 0.00 | -0.03 | 0.00 | 0.04 | 0.05 | 0.00 | 0.01 | 0.00 | 0.03 |
| S6 | 0.00 | 0.03 | 0.00 | 0.00 | 0.00 |  | 0.00 | 0.00 | 0.06 | 0.00 | 0.08 | 0.00 | 0.00 | 0.00 | 0.00 | 0.00 | 0.01 | 0.07 | 0.04 | 0.00 | 0.00 | 0.00 | 0.00 | 0.00 | 0.00 | 0.02 | 0.02 |
| S7 | 0.30 | 0.04 | 0.10 | 0.00 | 0.24 | 0.00 |  | 0.04 | 0.00 | 0.05 | 0.00 | 0.00 | 0.00 | 0.05 | 0.24 | 0.00 | 0.01 | 0.00 | 0.00 | 0.00 | 0.00 | 0.05 | 0.00 | -0.02 | 0.00 | 0.00 | 0.05 |
| A1 | 0.07 | 0.02 | 0.00 | 0.00 | 0.03 | 0.00 | 0.04 |  | 0.17 | 0.30 | 0.05 | 0.00 | 0.02 | 0.00 | 0.12 | 0.00 | 0.07 | 0.00 | 0.00 | 0.00 | 0.02 | 0.00 | 0.00 | 0.00 | 0.02 | 0.00 | 0.06 |
| A2 | 0.00 | 0.00 | 0.00 | 0.00 | 0.00 | 0.06 | 0.00 | 0.17 |  | 0.24 | 0.13 | 0.00 | 0.13 | 0.00 | 0.00 | 0.00 | 0.01 | 0.03 | 0.07 | 0.00 | 0.00 | 0.00 | 0.01 | 0.00 | 0.01 | 0.01 | 0.00 |
| A3 | 0.00 | 0.01 | 0.02 | 0.00 | 0.00 | 0.00 | 0.05 | 0.30 | 0.24 |  | 0.10 | 0.00 | 0.00 | 0.04 | 0.08 | 0.00 | 0.06 | 0.05 | 0.03 | 0.00 | 0.02 | 0.05 | 0.00 | 0.00 | 0.00 | 0.00 | 0.05 |
| A4 | 0.00 | 0.00 | 0.00 | 0.00 | 0.00 | 0.08 | 0.00 | 0.05 | 0.13 | 0.10 |  | 0.00 | 0.15 | 0.00 | 0.00 | 0.00 | 0.00 | 0.03 | 0.09 | 0.00 | 0.16 | 0.07 | 0.00 | 0.00 | 0.03 | 0.02 | 0.00 |
| A5 | 0.00 | 0.00 | 0.00 | 0.00 | 0.00 | 0.00 | 0.00 | 0.00 | 0.00 | 0.00 | 0.00 |  | 0.00 | 0.00 | 0.00 | 0.34 | 0.00 | 0.00 | 0.00 | 0.10 | 0.00 | 0.00 | -0.03 | 0.15 | 0.00 | 0.10 | 0.00 |
| A6 | 0.00 | 0.00 | 0.00 | 0.00 | 0.00 | 0.00 | 0.00 | 0.02 | 0.13 | 0.00 | 0.15 | 0.00 |  | 0.09 | 0.00 | 0.00 | 0.14 | 0.03 | 0.12 | 0.00 | 0.12 | 0.00 | 0.02 | 0.02 | 0.00 | 0.00 | 0.00 |
| A7 | 0.02 | 0.05 | 0.01 | 0.00 | 0.04 | 0.00 | 0.05 | 0.00 | 0.00 | 0.04 | 0.00 | 0.00 | 0.09 |  | 0.26 | 0.00 | 0.04 | 0.11 | 0.03 | 0.00 | 0.08 | 0.09 | 0.00 | 0.00 | 0.04 | 0.00 | 0.00 |
| A8 | 0.07 | 0.01 | 0.00 | 0.00 | 0.00 | 0.00 | 0.24 | 0.12 | 0.00 | 0.08 | 0.00 | 0.00 | 0.00 | 0.26 |  | 0.00 | 0.03 | 0.08 | 0.02 | -0.01 | 0.00 | 0.06 | 0.02 | -0.02 | 0.08 | 0.01 | 0.00 |
| A9 | 0.00 | 0.00 | 0.02 | 0.00 | 0.00 | 0.00 | 0.00 | 0.00 | 0.00 | 0.00 | 0.00 | 0.34 | 0.00 | 0.00 | 0.00 |  | 0.00 | 0.00 | 0.00 | 0.25 | 0.00 | -0.01 | 0.00 | 0.16 | 0.00 | 0.19 | 0.00 |
| A10 | 0.01 | 0.00 | 0.00 | 0.02 | 0.03 | 0.01 | 0.01 | 0.07 | 0.01 | 0.06 | 0.00 | 0.00 | 0.14 | 0.04 | 0.03 | 0.00 |  | 0.10 | 0.01 | -0.03 | 0.06 | 0.03 | 0.01 | 0.00 | 0.21 | 0.00 | 0.04 |
| A11 | 0.00 | 0.01 | 0.00 | 0.00 | 0.01 | 0.07 | 0.00 | 0.00 | 0.03 | 0.05 | 0.03 | 0.00 | 0.03 | 0.11 | 0.08 | 0.00 | 0.10 |  | 0.28 | 0.00 | 0.16 | 0.00 | 0.05 | 0.00 | 0.02 | 0.01 | 0.05 |
| A12 | 0.00 | 0.00 | 0.00 | 0.00 | 0.00 | 0.04 | 0.00 | 0.00 | 0.07 | 0.03 | 0.09 | 0.00 | 0.12 | 0.03 | 0.02 | 0.00 | 0.01 | 0.28 |  | 0.00 | 0.11 | 0.00 | 0.00 | 0.00 | 0.02 | 0.00 | 0.00 |
| A13 | 0.00 | 0.00 | 0.00 | 0.00 | -0.03 | 0.00 | 0.00 | 0.00 | 0.00 | 0.00 | 0.00 | 0.10 | 0.00 | 0.00 | -0.01 | 0.25 | -0.03 | 0.00 | 0.00 |  | 0.00 | 0.00 | -0.09 | 0.28 | 0.00 | 0.16 | -0.02 |
| A14 | 0.00 | 0.00 | 0.00 | 0.00 | 0.00 | 0.00 | 0.00 | 0.02 | 0.00 | 0.02 | 0.16 | 0.00 | 0.12 | 0.08 | 0.00 | 0.00 | 0.06 | 0.16 | 0.11 | 0.00 |  | 0.14 | 0.00 | 0.00 | 0.00 | 0.02 | 0.05 |
| A15 | 0.00 | 0.00 | 0.01 | 0.00 | 0.04 | 0.00 | 0.05 | 0.00 | 0.00 | 0.05 | 0.07 | 0.00 | 0.00 | 0.09 | 0.06 | -0.01 | 0.03 | 0.00 | 0.00 | 0.00 | 0.14 |  | 0.05 | 0.00 | 0.00 | 0.00 | 0.08 |
| A16 | 0.01 | 0.01 | 0.00 | 0.01 | 0.05 | 0.00 | 0.00 | 0.00 | 0.01 | 0.00 | 0.00 | -0.03 | 0.02 | 0.00 | 0.02 | 0.00 | 0.01 | 0.05 | 0.00 | -0.09 | 0.00 | 0.05 |  | -0.01 | 0.21 | -0.03 | 0.04 |
| A17 | 0.00 | -0.01 | 0.00 | 0.00 | 0.00 | 0.00 | -0.02 | 0.00 | 0.00 | 0.00 | 0.00 | 0.15 | 0.02 | 0.00 | -0.02 | 0.16 | 0.00 | 0.00 | 0.00 | 0.28 | 0.00 | 0.00 | -0.01 |  | -0.02 | 0.30 | 0.00 |
| A18 | 0.00 | 0.00 | 0.00 | 0.00 | 0.01 | 0.00 | 0.00 | 0.02 | 0.01 | 0.00 | 0.03 | 0.00 | 0.00 | 0.04 | 0.08 | 0.00 | 0.21 | 0.02 | 0.02 | 0.00 | 0.00 | 0.00 | 0.21 | -0.02 |  | 0.00 | 0.06 |
| A19 | 0.08 | 0.12 | 0.04 | 0.00 | 0.00 | 0.02 | 0.00 | 0.00 | 0.01 | 0.00 | 0.02 | 0.10 | 0.00 | 0.00 | 0.01 | 0.19 | 0.00 | 0.01 | 0.00 | 0.16 | 0.02 | 0.00 | -0.03 | 0.30 | 0.00 |  | 0.00 |
| A20 | 0.04 | 0.03 | 0.00 | 0.00 | 0.03 | 0.02 | 0.05 | 0.06 | 0.00 | 0.05 | 0.00 | 0.00 | 0.00 | 0.00 | 0.00 | 0.00 | 0.04 | 0.05 | 0.00 | -0.02 | 0.05 | 0.08 | 0.04 | 0.00 | 0.06 | 0.00 |  |

Note:A1 = Anxiety; A2 = Fear; A3 = Panic; A4 = Insanity; A5 = Misfortune premonition; A6 = Tremble; A7 = Somatic pain; A8 = Fatigue; A9 = Restlessness; A10 = Tachycardia; A11 = Dizzy; A12 = Faint; A13 = Breathing difficulty; A14 = Tingle; A15 = Stomach pains or indigestion; A16 = Frequent urination; A17 = Hyperhidrosis; A18 = Facial flushing; A19 = Sleeping disorder; A20 = Nightmare; S1 = Subjective sleep quality; S2 = Sleep latency; S3 = Sleep duration; S4 = Habitual sleep efficiency; S5 = Sleeping disturbance; S6 = Hypnotic drugs; S7 = Daytime dysfunction


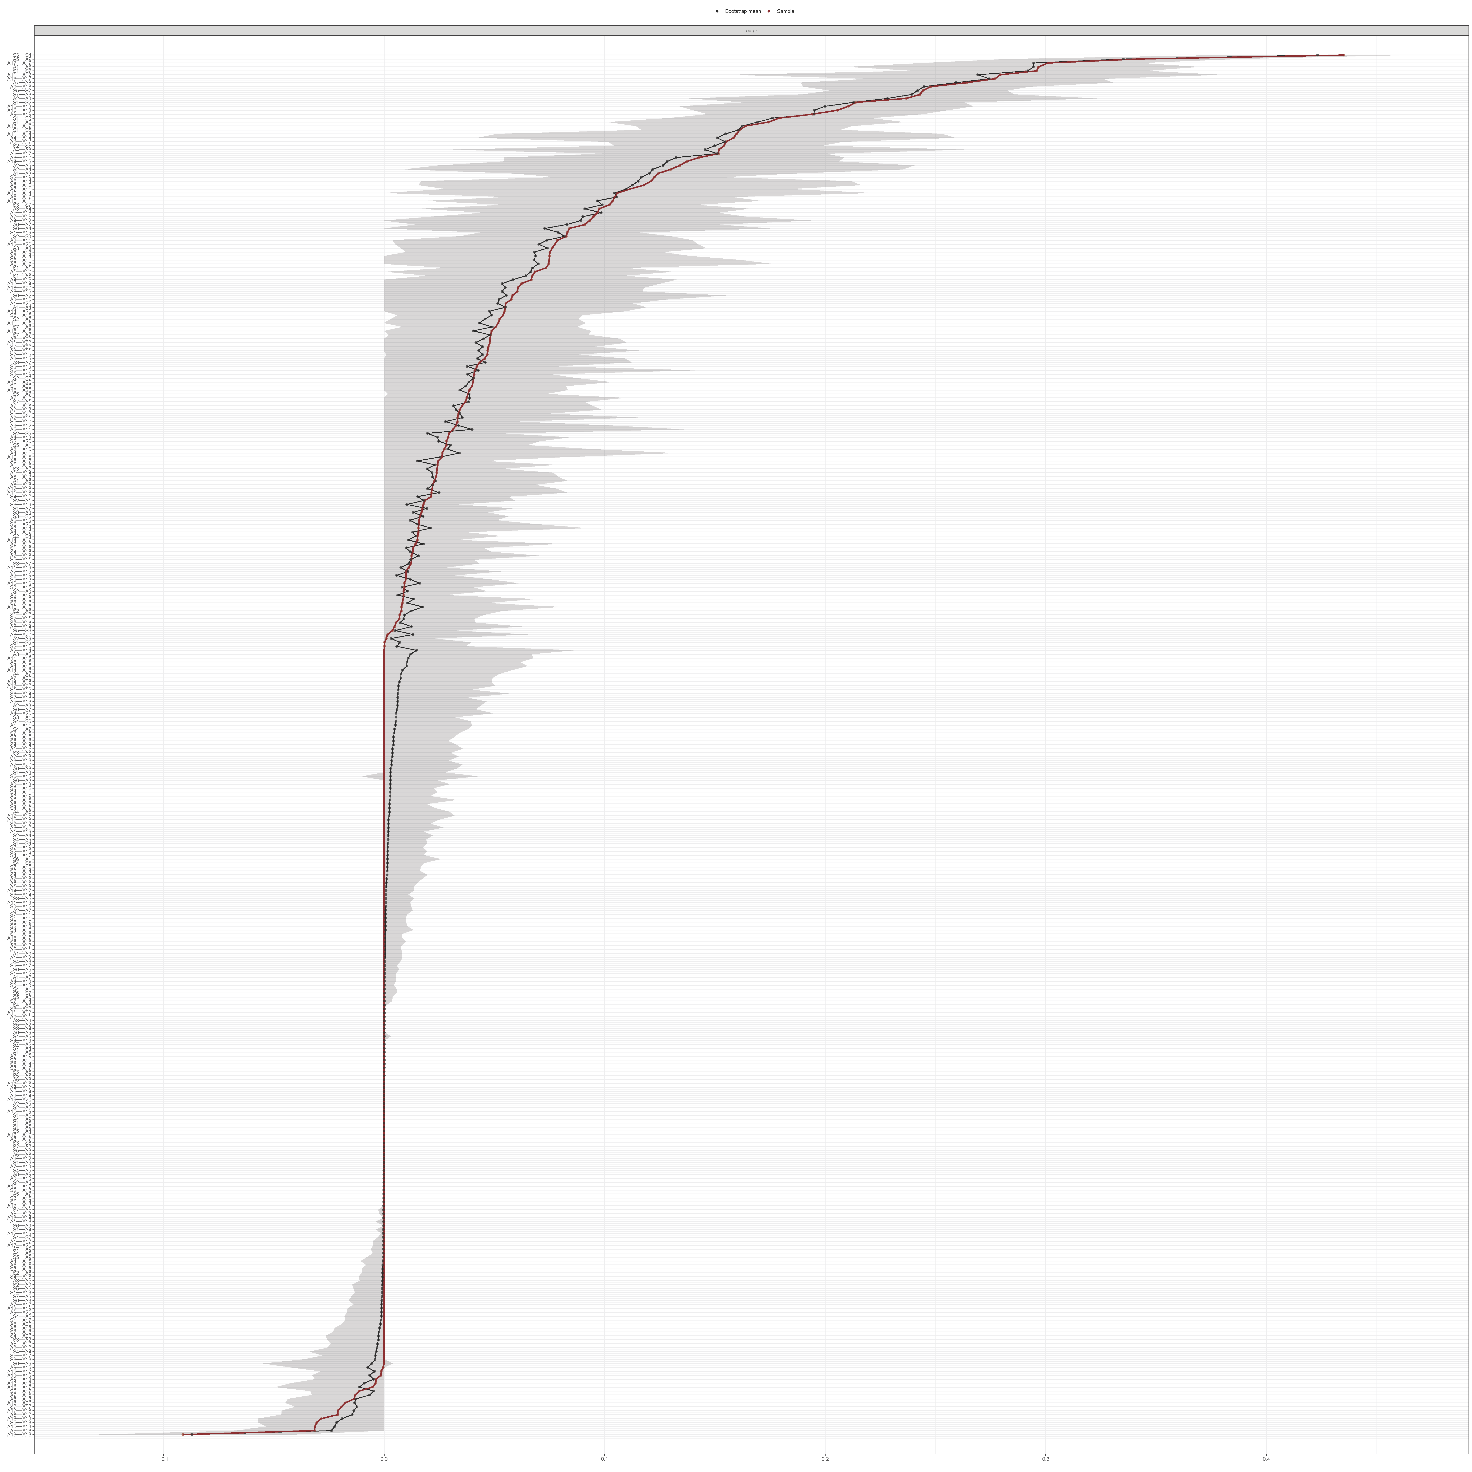


**Supplementary Figure S1. Accuracy test of edge weights in the anxiety-sleep quality network.** Note: The gray area represents the bootstrapped confidence intervals and the red line represents the sample edge weight values. A1 = Anxiety; A2 = Fear; A3 = Panic; A4 = Insanity; A5 = Misfortune premonition; A6 = Tremble; A7 = Somatic pain; A8 = Fatigue; A9 = Restlessness; A10 = Tachycardia; A11 = Dizzy; A12 = Faint; A13 = Breathing difficulty; A14 = Tingle; A15 = Stomach pains or indigestion; A16 = Frequent urination; A17 = Hyperhidrosis; A18 = Facial flushing; A19 = Sleeping disorder; A20 = Nightmare; S1 = Subjective sleep quality; S2 = Sleep latency; S3 = Sleep duration; S4 = Habitual sleep efficiency; S5 = Sleeping disturbance; S6 = Hypnotic drugs; S7 = Daytime dysfunction.


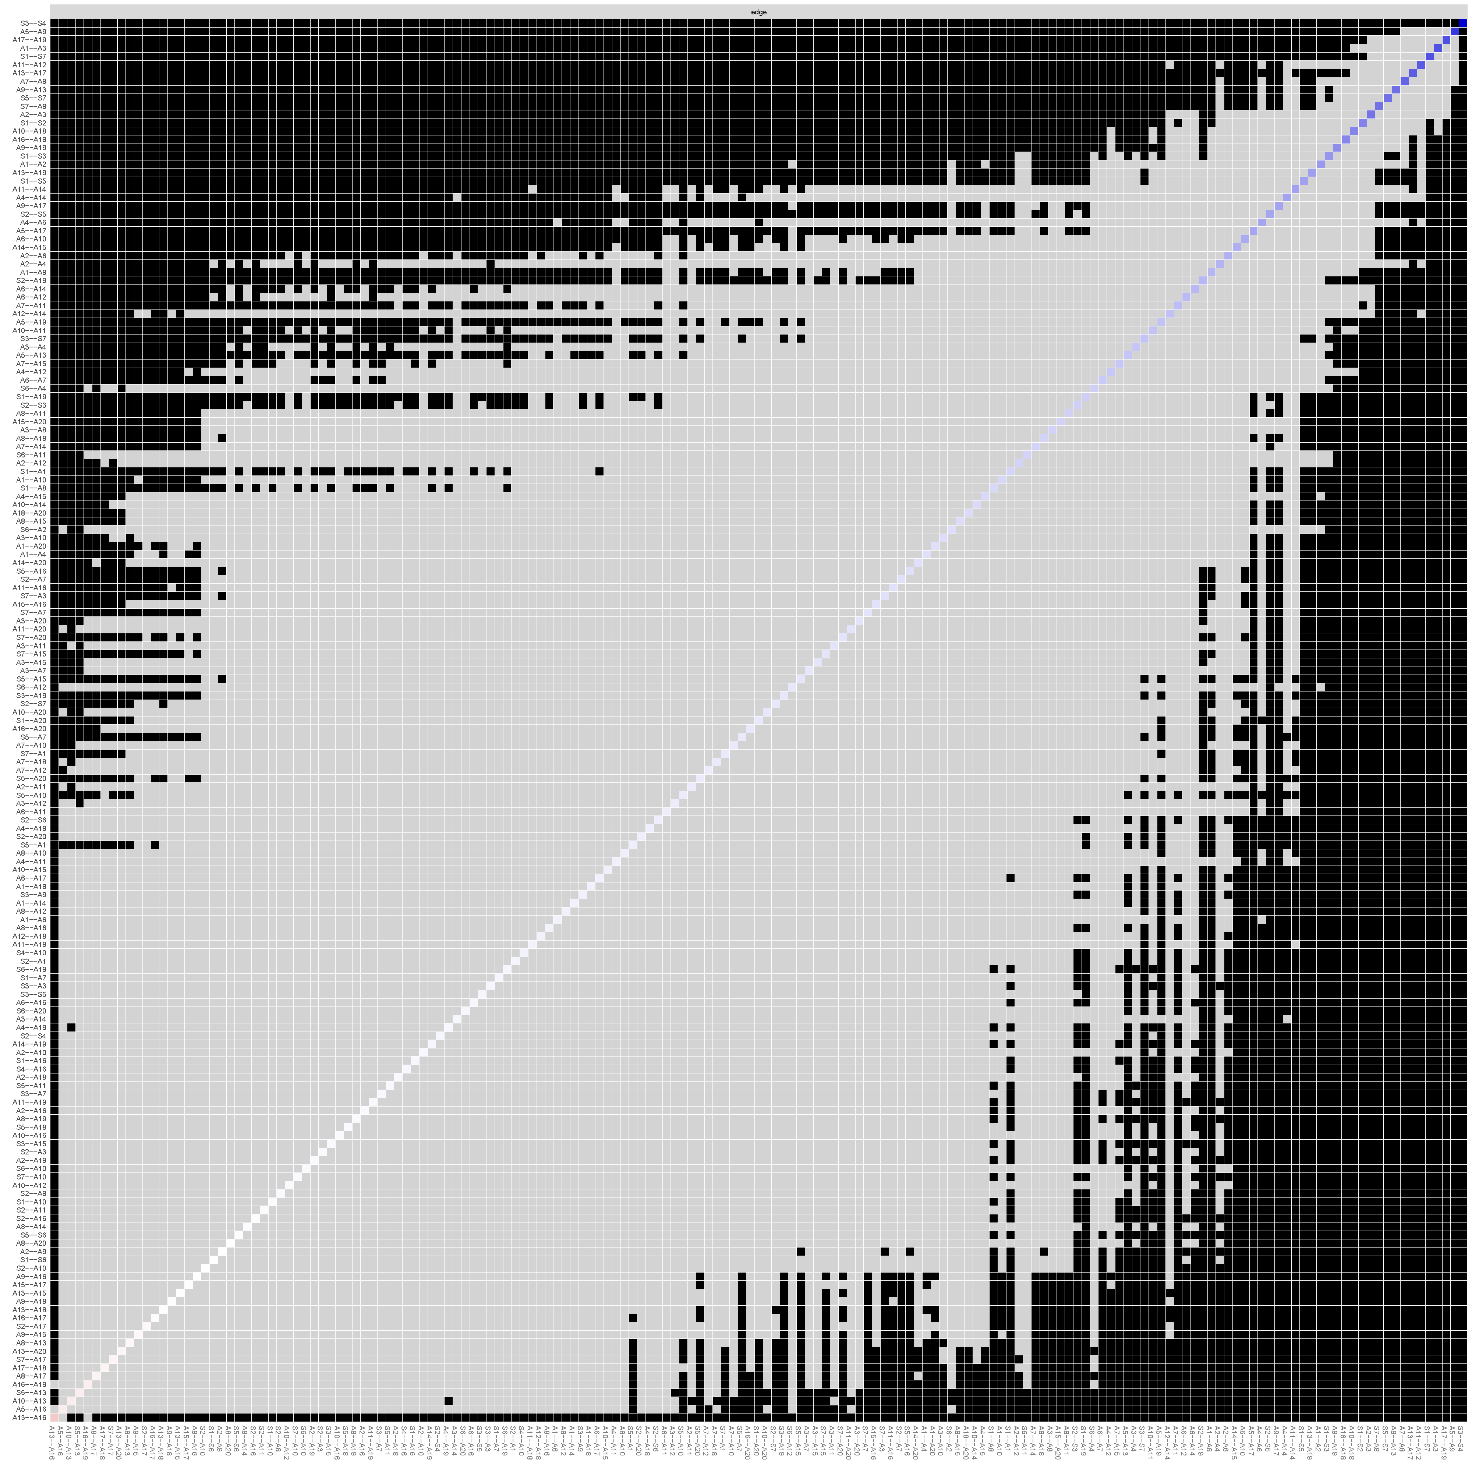


**Supplementary Figure S2. Bootstrapped difference test of edge weights in the anxiety-sleep quality network.**  Note: The gray box represents that the edge weights of the two corresponding node pairs have no significant difference, and the black box represents a significant difference. Blue and red boxes on the diagonal represent positive and negative edge weights, respectively. A1 = Anxiety; A2 = Fear; A3 = Panic; A4 = Insanity; A5 = Misfortune premonition; A6 = Tremble; A7 = Somatic pain; A8 = Fatigue; A9 = Restlessness; A10 = Tachycardia; A11 = Dizzy; A12 = Faint; A13 = Breathing difficulty; A14 = Tingle; A15 = Stomach pains or indigestion; A16 = Frequent urination; A17 = Hyperhidrosis; A18 = Facial flushing; A19 = Sleeping disorder; A20 = Nightmare; S1 = Subjective sleep quality; S2 = Sleep latency; S3 = Sleep duration; S4 = Habitual sleep efficiency; S5 = Sleeping disturbance; S6 = Hypnotic drugs; S7 = Daytime dysfunction.


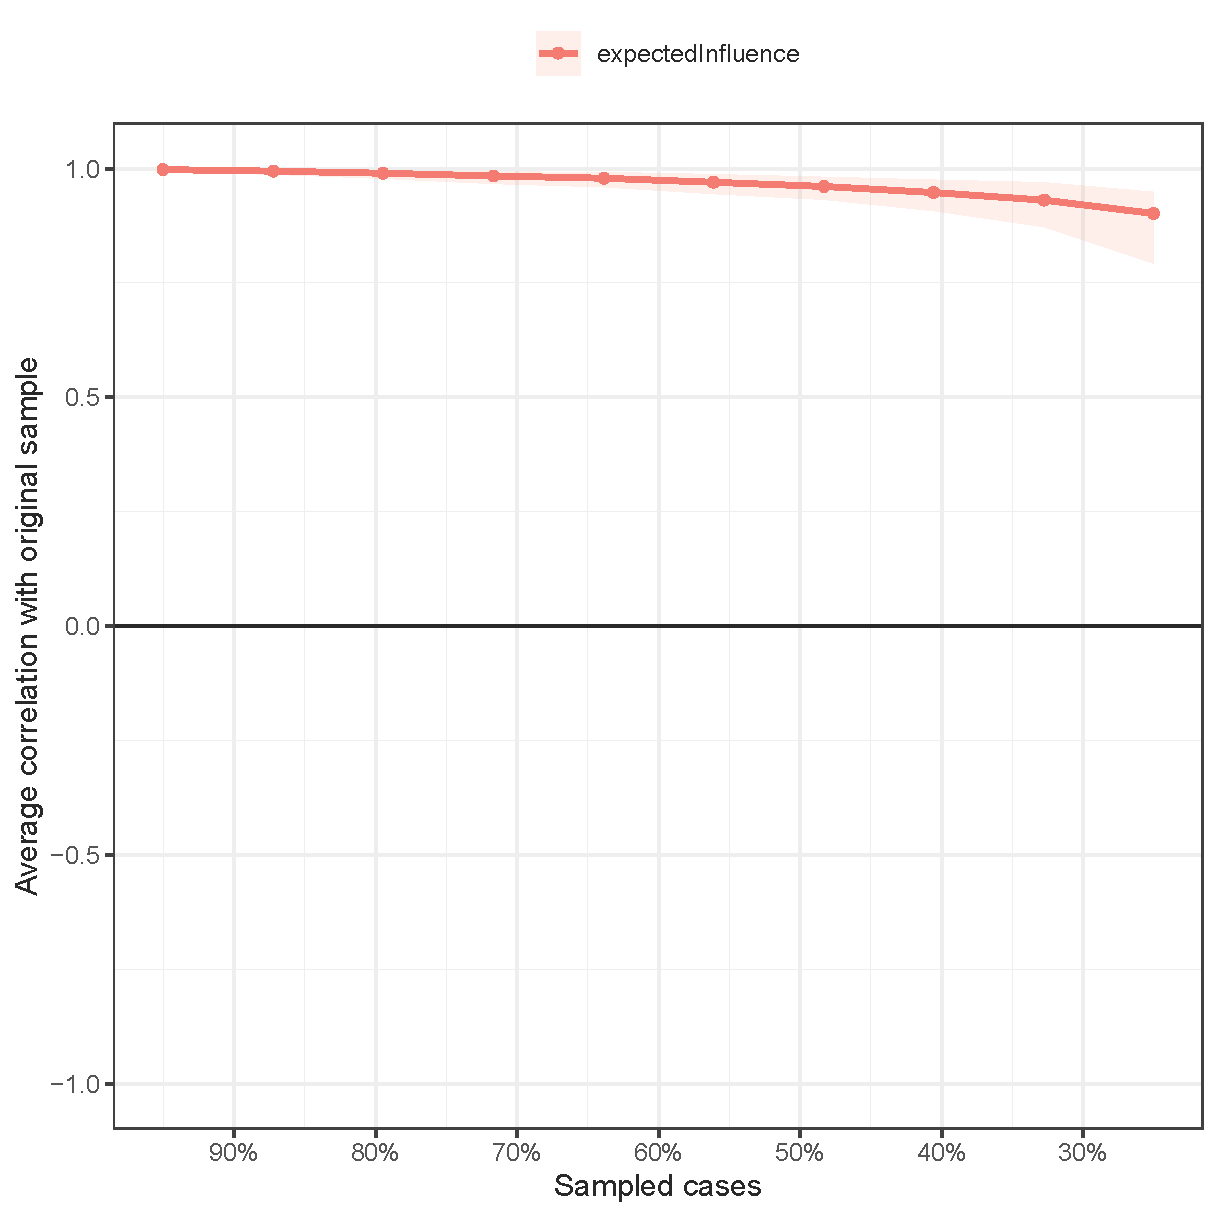


**Supplementary Figure S3. Stability of expected influences in the anxiety-sleep quality network.** Note: The red bar represents the average correlation between expected influences in the full sample and subsample with the red area depicting the 2.5th quantile to the 97.5th quantile.


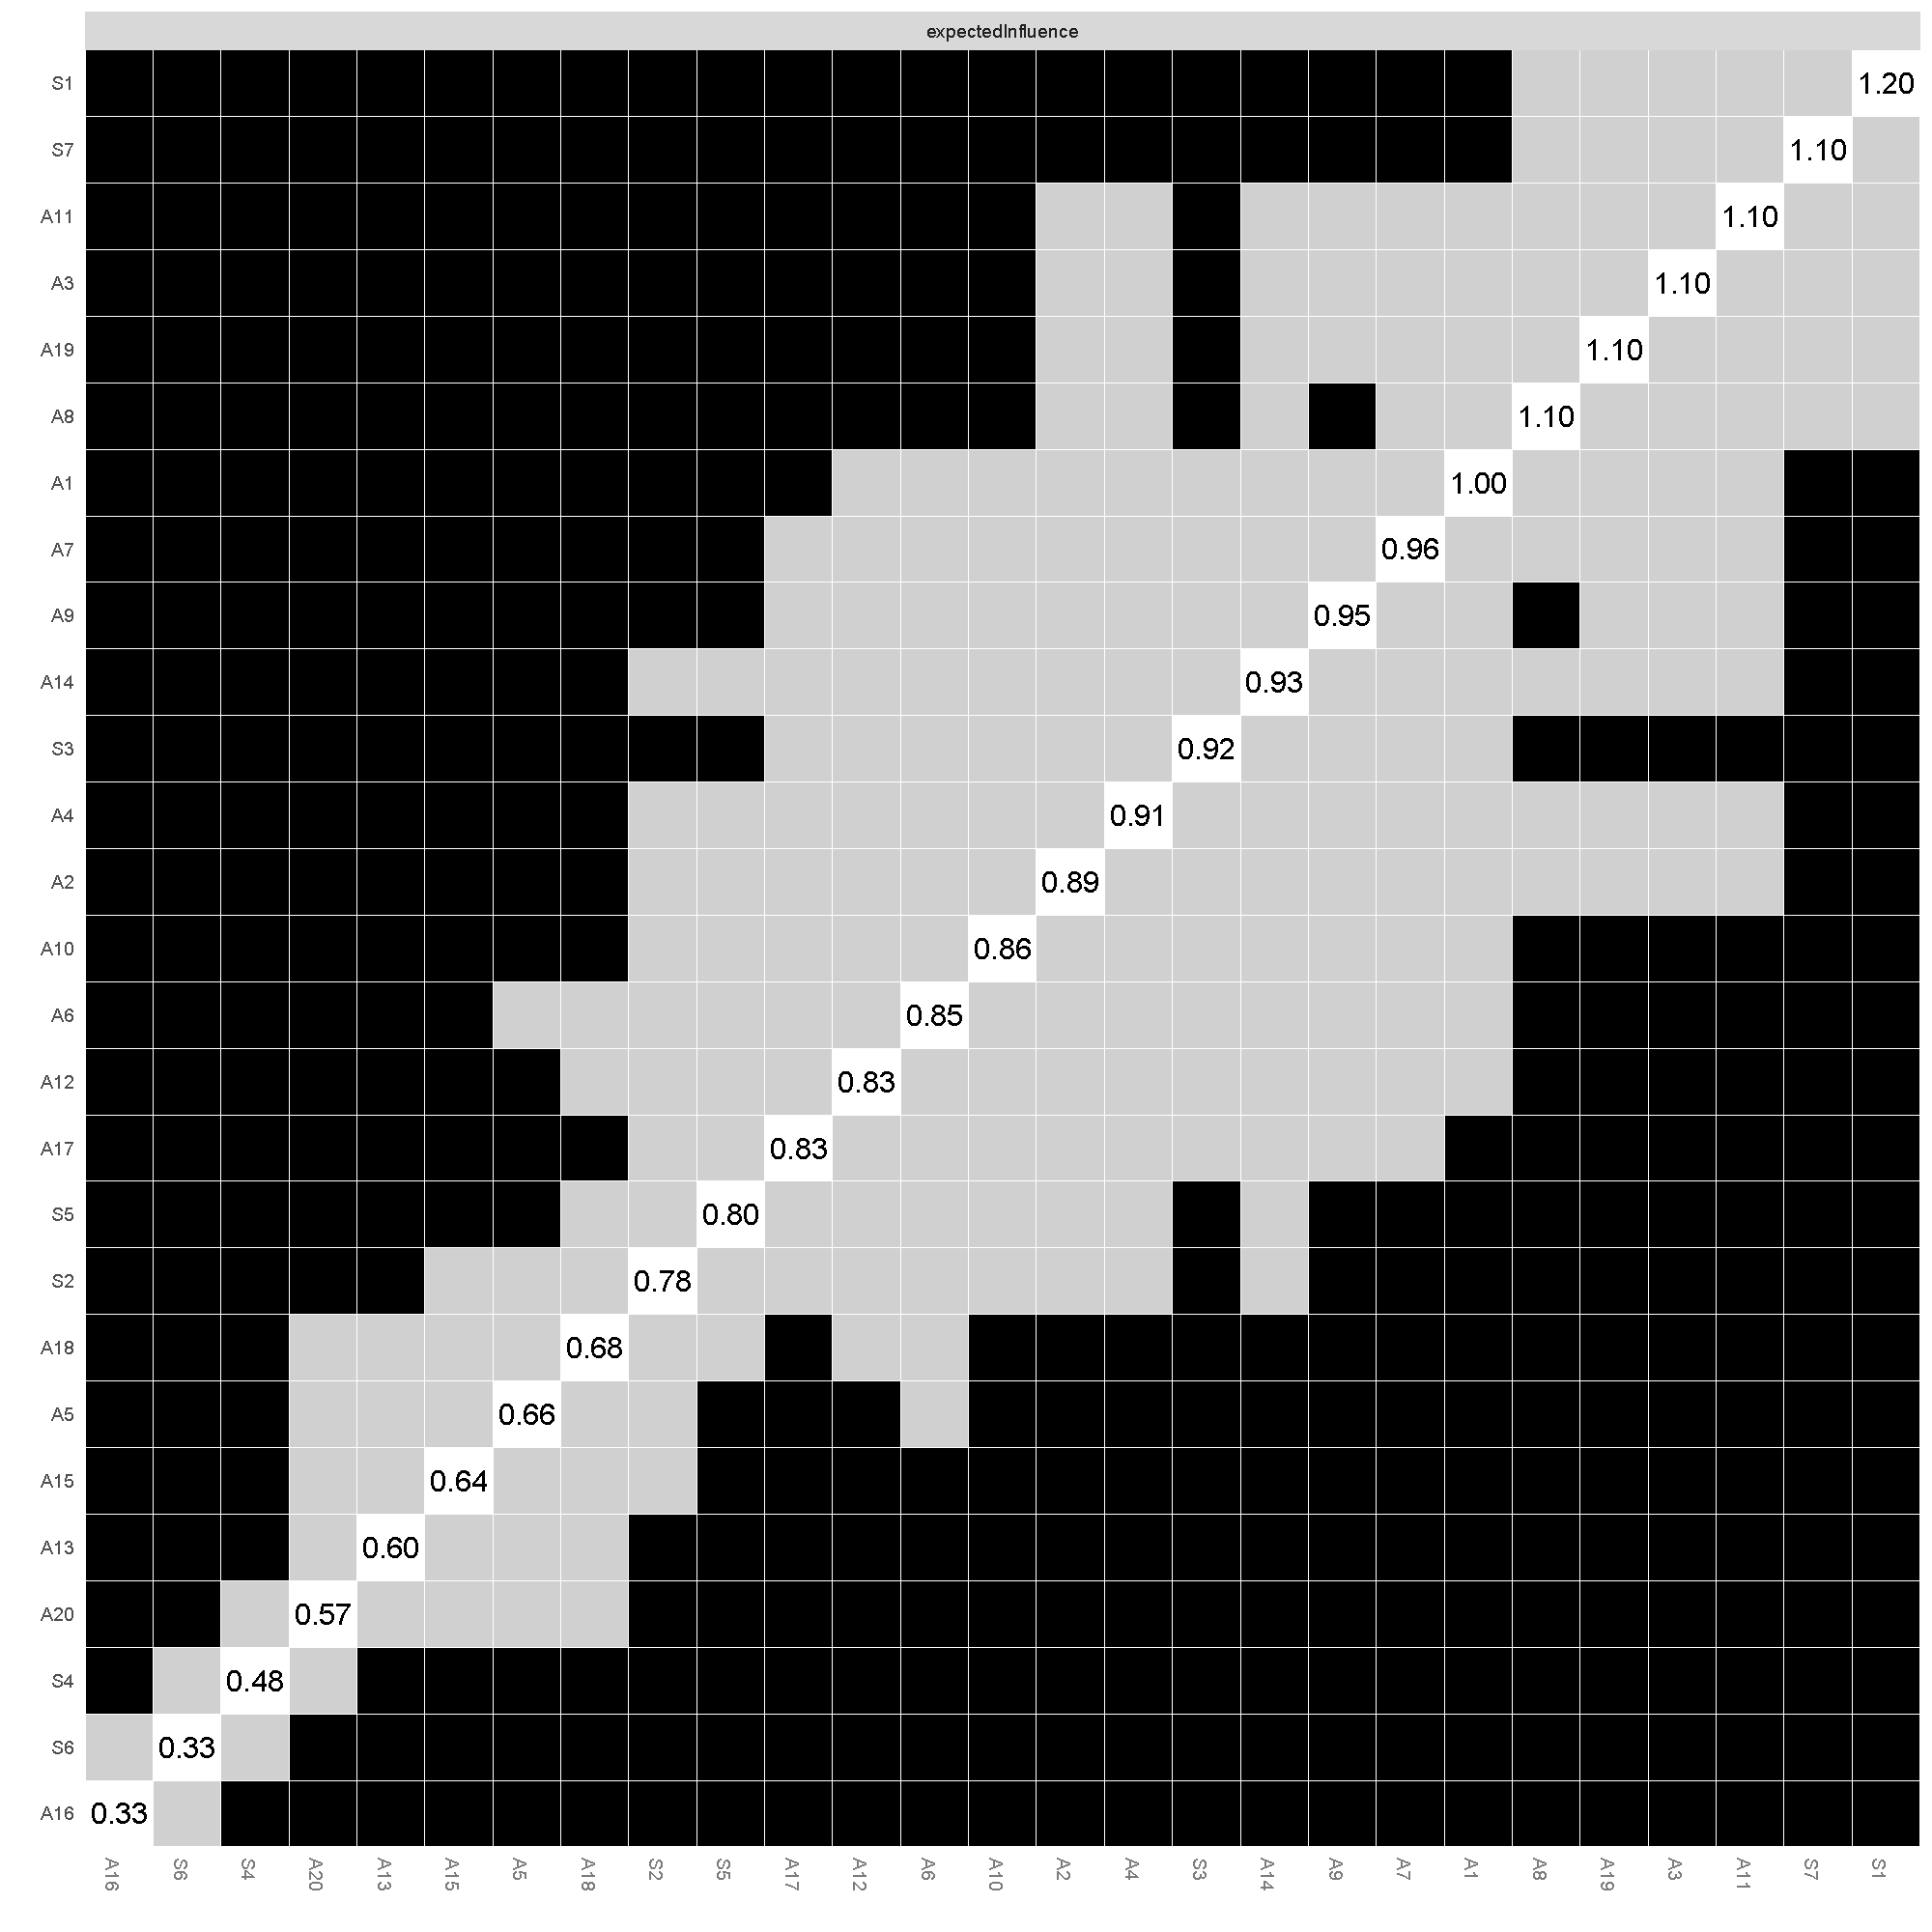


**Supplementary Figure S4. Bootstrapped difference test of expected influences in the anxiety-sleep quality network.** Note: The black box indicates that the expected influences of the two corresponding nodes have a significant difference, the gray box indicated no significant difference. Note: A1 = Anxiety; A2 = Fear; A3 = Panic; A4 = Insanity; A5 = Misfortune premonition; A6 = Tremble; A7 = Somatic pain; A8 = Fatigue; A9 = Restlessness; A10 = Tachycardia; A11 = Dizzy; A12 = Faint; A13 = Breathing difficulty; A14 = Tingle; A15 = Stomach pains or indigestion; A16 = Frequent urination; A17 = Hyperhidrosis; A18 = Facial flushing; A19 = Sleeping disorder; A20 = Nightmare; S1 = Subjective sleep quality; S2 = Sleep latency; S3 = Sleep duration; S4 = Habitual sleep efficiency; S5 = Sleeping disturbance; S6 = Hypnotic drugs; S7 = Daytime dysfunction.


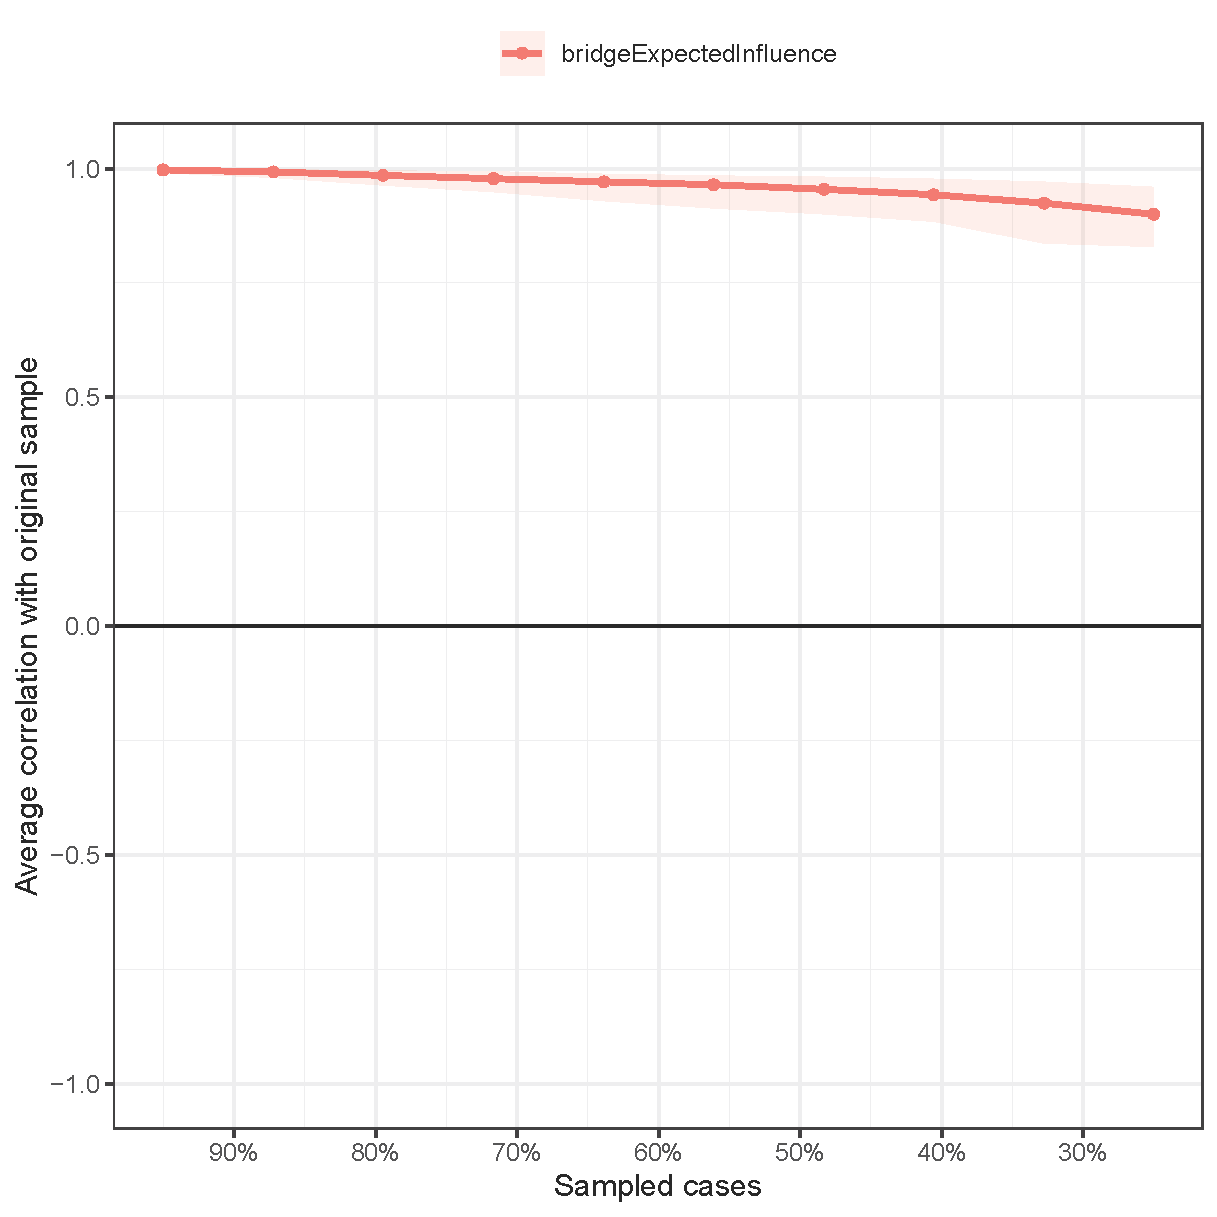


**Supplementary Figure S5. Stability of bridge expected influences in the anxiety-sleep quality network.** Note: The red bar represents the average correlation between bridge expected influences in the full sample and subsample with the red area depicting the 2.5th quantile to the 97.5th quantile.





**Supplementary Figure S6. Bootstrapped difference test of bridge expected influences in the anxiety-sleep quality network.** Note: The black box indicates that the bridge expected influences of the two corresponding nodes have a significant difference, the gray box indicated no significant difference. Note: A1 = Anxiety; A2 = Fear; A3 = Panic; A4 = Insanity; A5 = Misfortune premonition; A6 = Tremble; A7 = Somatic pain; A8 = Fatigue; A9 = Restlessness; A10 = Tachycardia; A11 = Dizzy; A12 = Faint; A13 = Breathing difficulty; A14 = Tingle; A15 = Stomach pains or indigestion; A16 = Frequent urination; A17 = Hyperhidrosis; A18 = Facial flushing; A19 = Sleeping disorder; A20 = Nightmare; S1 = Subjective sleep quality; S2 = Sleep latency; S3 = Sleep duration; S4 = Habitual sleep efficiency; S5 = Sleeping disturbance; S6 = Hypnotic drugs; S7 = Daytime dysfunction.
